# Supplementary material for: Formation mechanism of anisotropic gelatin hydrogel by self-assembly on oriented templates
Source: Royal Society of Chemistry journal article supplement (doi:10.1039/d4me00023d), 2024-01-01
Supplement: d4me00023d1.pdf [file d4me00023d1.pdf]

Support information for:

## **Formation mechanism of anisotropic gelatin hydrogel by self-assembly on oriented template**

Kohei Kawaguchi <sup>a</sup>, Tamaki Maeda <sup>a</sup>, Syuuhei Komatsu <sup>b</sup>,  
Yoshihiro Nomura <sup>c</sup>, and Kazuki Murai <sup>a,\*</sup>

<sup>a</sup> *Department of Chemistry and Materials, Faculty of Textile Science and Technology, Shinshu University, 3-15-1 Tokida, Ueda, Nagano 386-8567, Japan.*

<sup>b</sup> *Department of Materials Science and Technology, Faculty of Advanced Engineering, Tokyo University of Science, 6-3-1 Nijuku, Katsushika-ku, Tokyo 125-8585, Japan.*

<sup>c</sup> *Scleroprotein and Leather Research Institute, Faculty of Agriculture, Tokyo University of Agriculture and Technology, 3-5-8, Saiwai-cho, Fuchu, Tokyo 183-8509, Japan.*

\*Corresponding author: murai\_kazuki@shinshu-u.ac.jp (Dr. K. Murai)

### **Contents**

- 1. S1. AFM images of the oriented and non-oriented templates**
- 2. S2. TG-DTA profiles of the prepared hydrogels**
- 3. S3. Swelling behavior of the prepared hydrogels at several cooling rates**

**S1. AFM images of the oriented and non-oriented templates.**

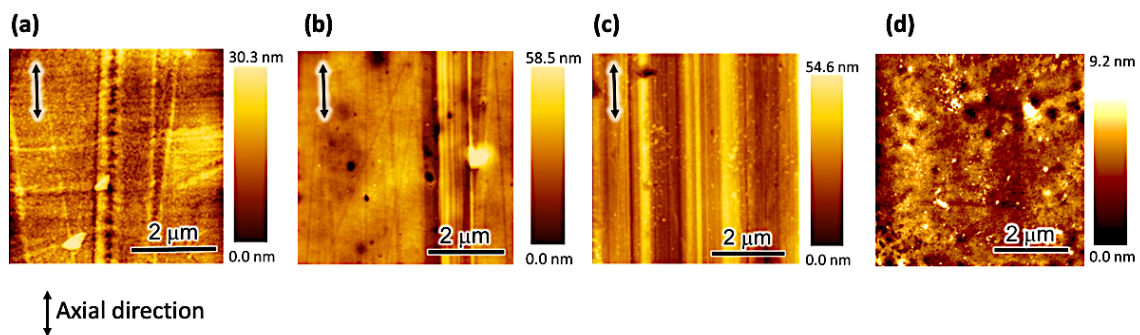

**Figure S1.** Surface morphologies of oriented (a: PP, b: PVC, and c: Al sheet-coated substrates) and non-oriented (d: glass substrate) templates observed by AFM.

**S2. TG-DTA profiles of the prepared hydrogels.**

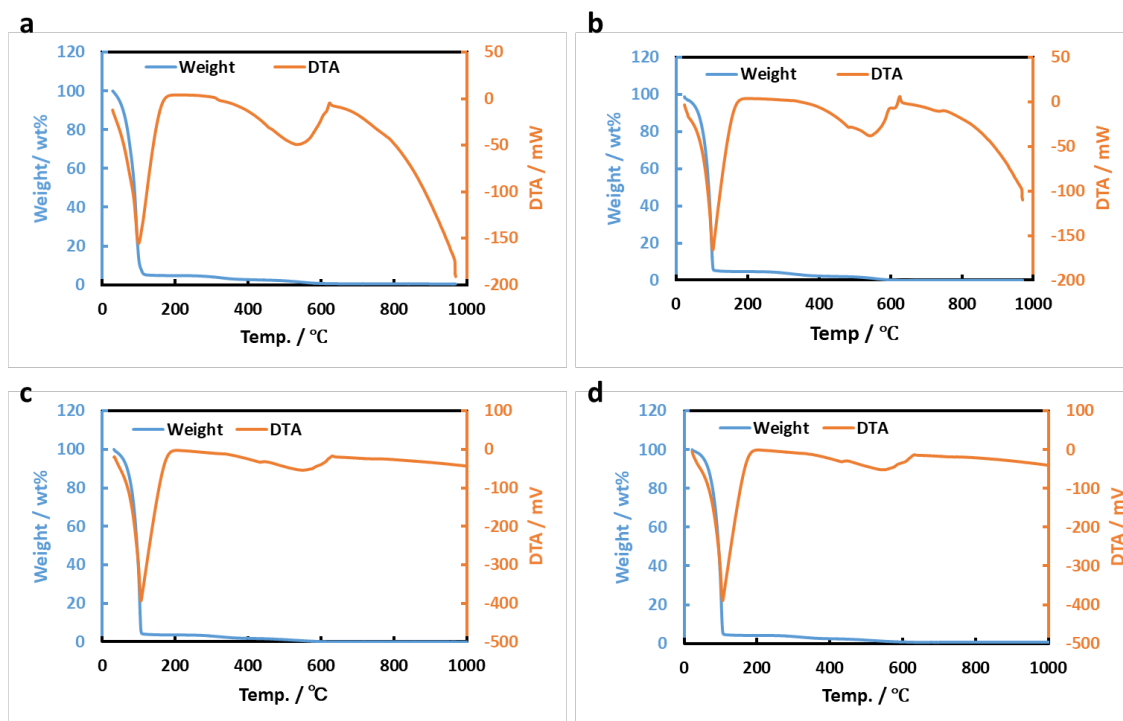

**Figure S2.** TG-DTA profiles of the gelatin hydrogels prepared in the (a) PP, (b) PVC, (c) Al, and (d) glass systems. The blue and orange lines represent the weight loss and DTA profiles, respectively.

In each TG-DTA profile, a rapid weight loss and an endothermic peak were observed at 100 °C, which was attributed to the evaporation of water. A slight decrease in the weight and an endothermic peak were also observed at around 552 °C, which was attributed to gelatin degradation.

### S3. Swelling behavior of the prepared hydrogels at several cooling rates

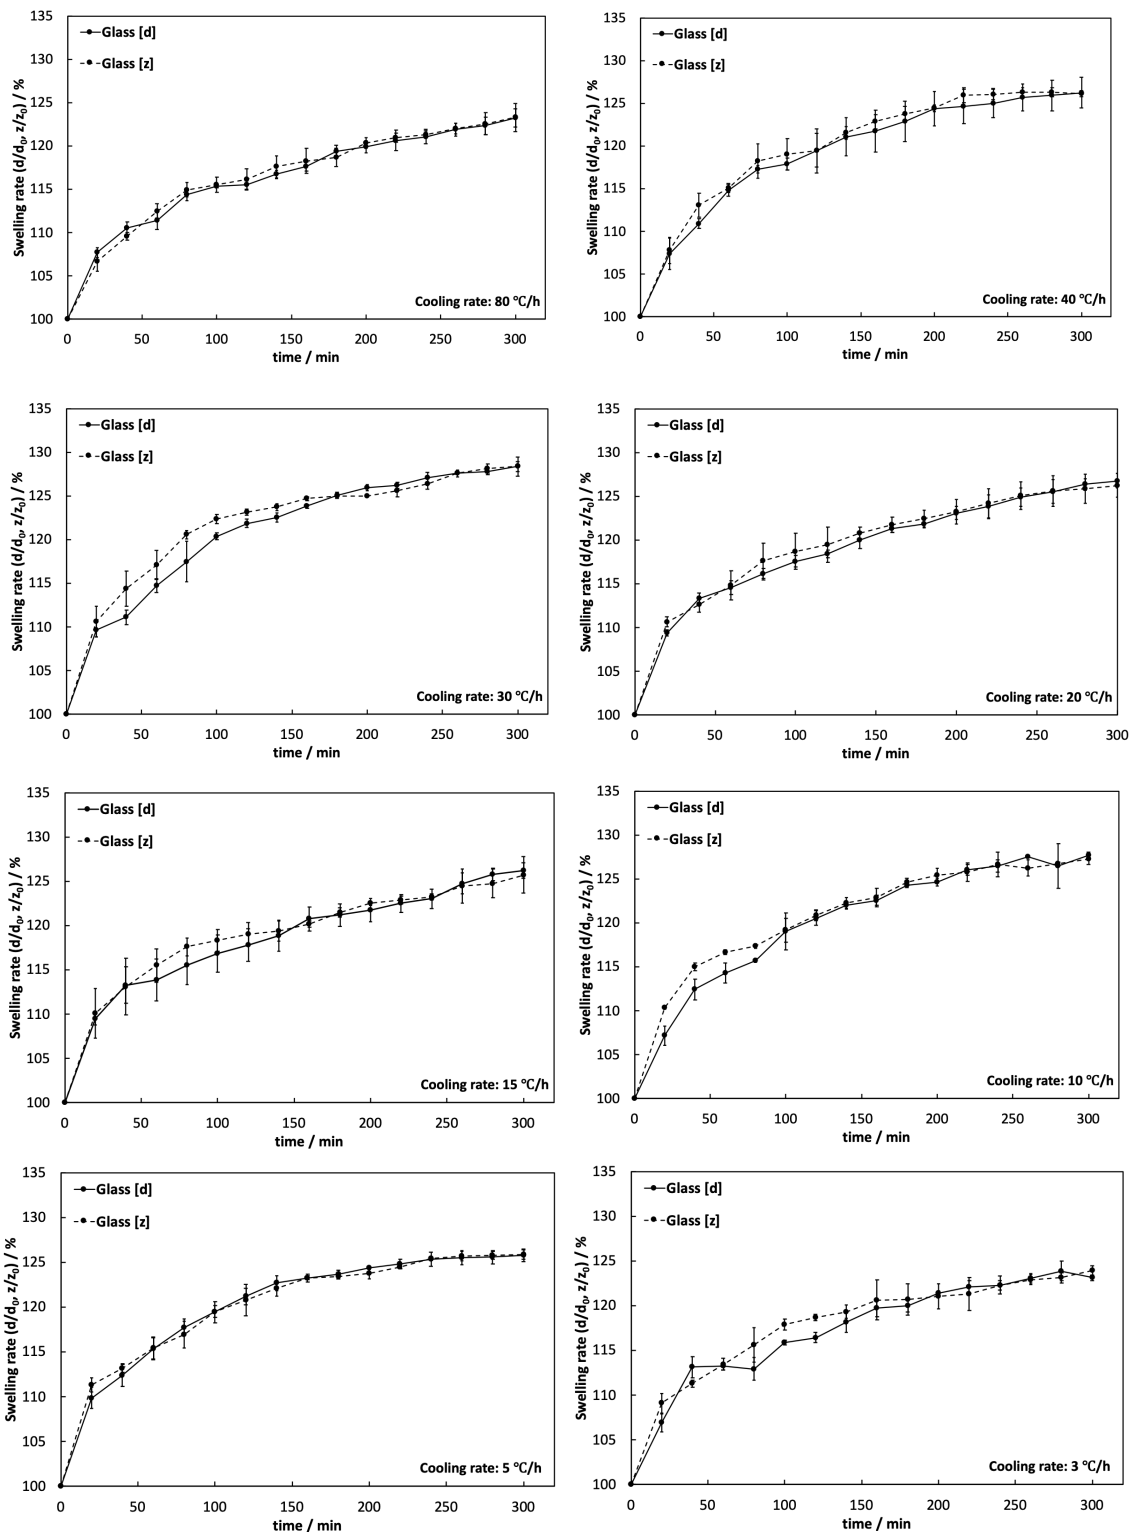

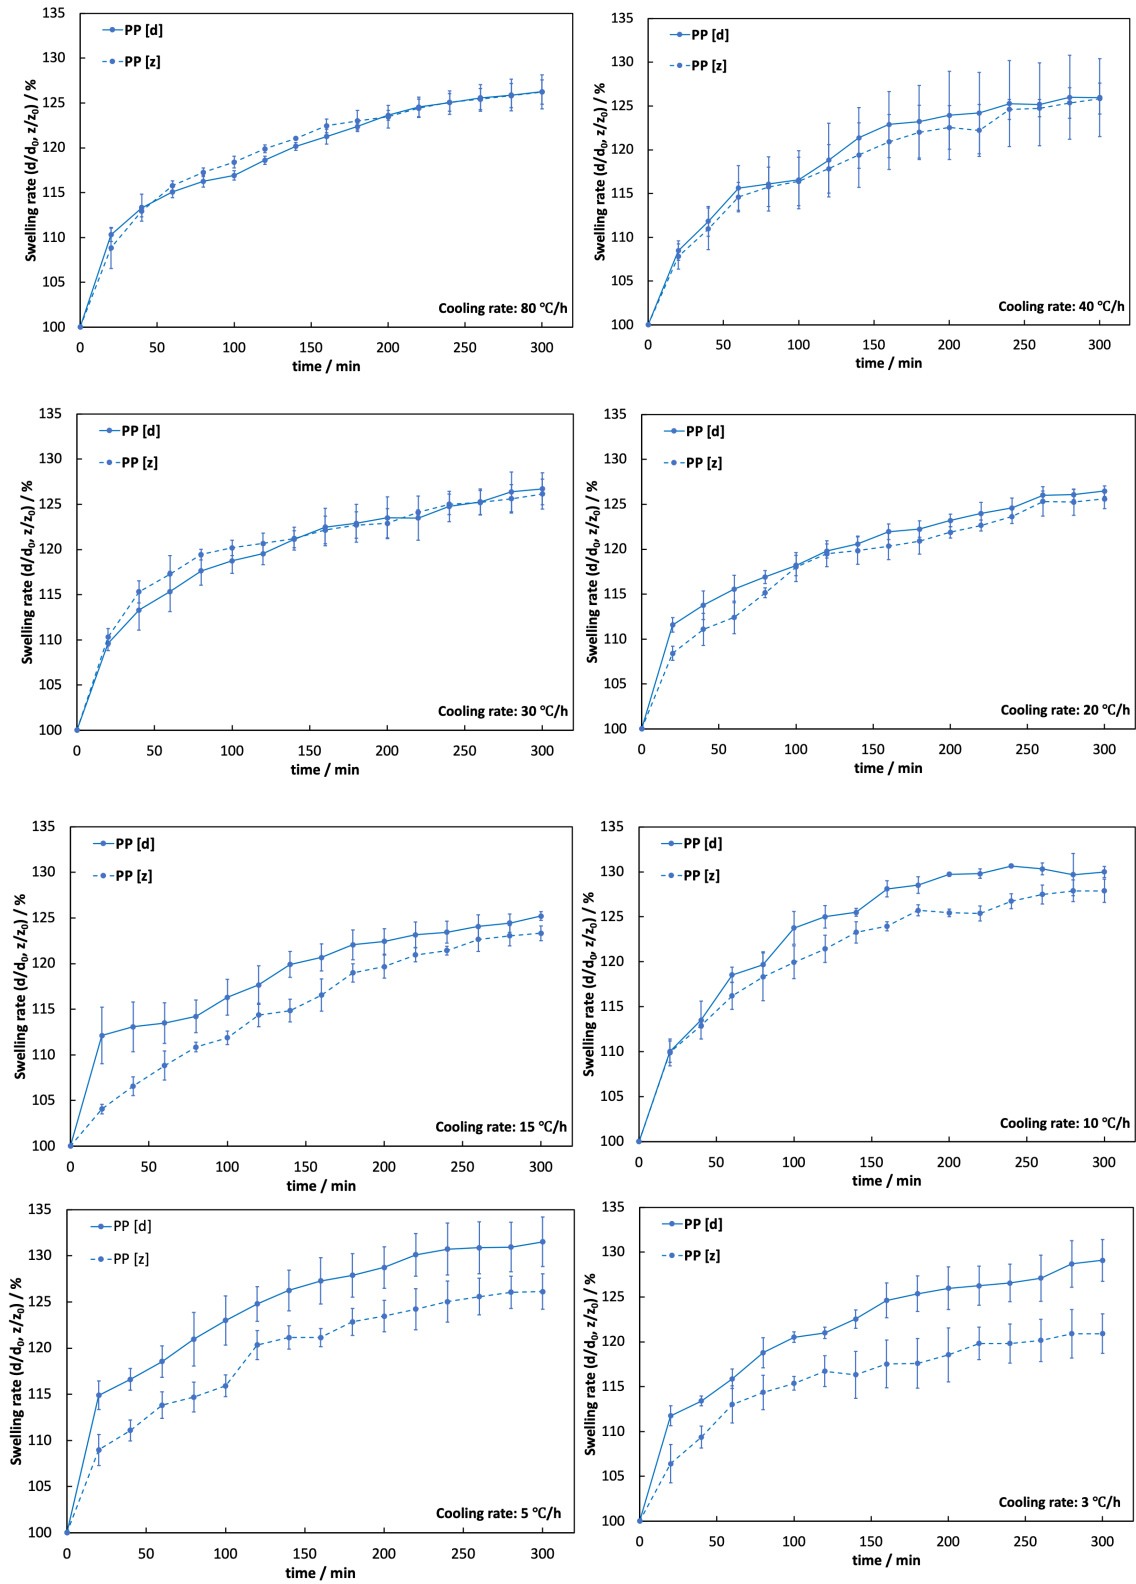

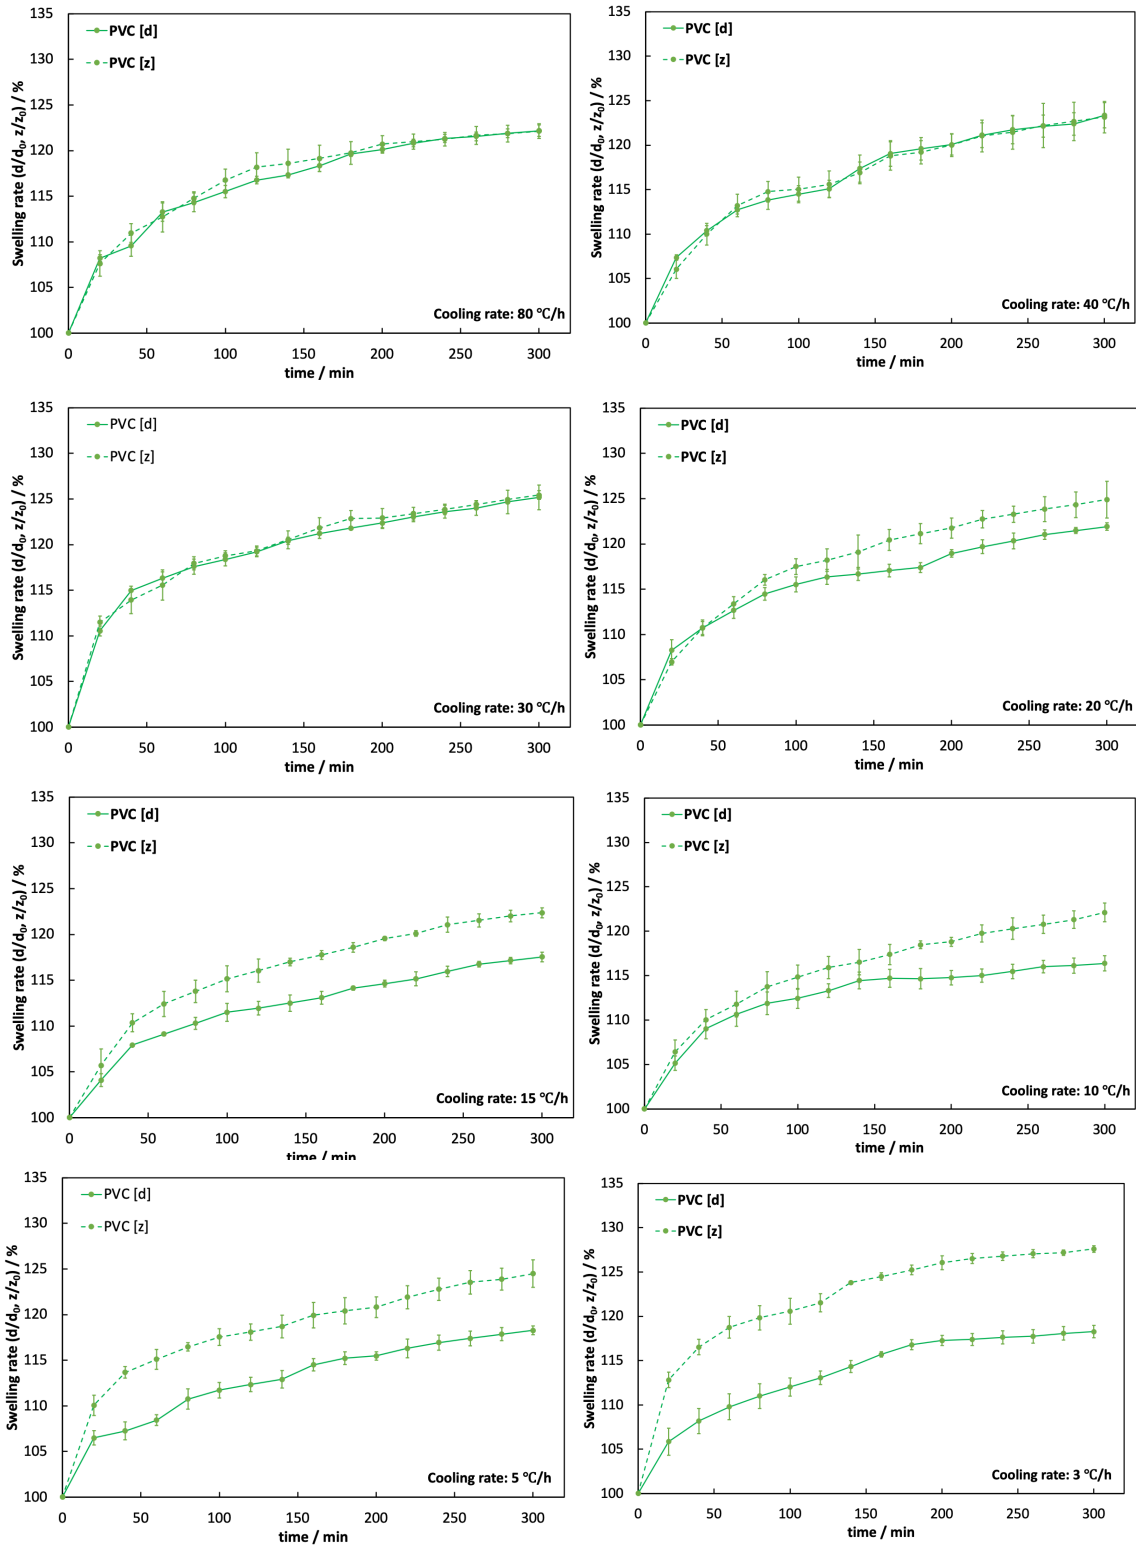

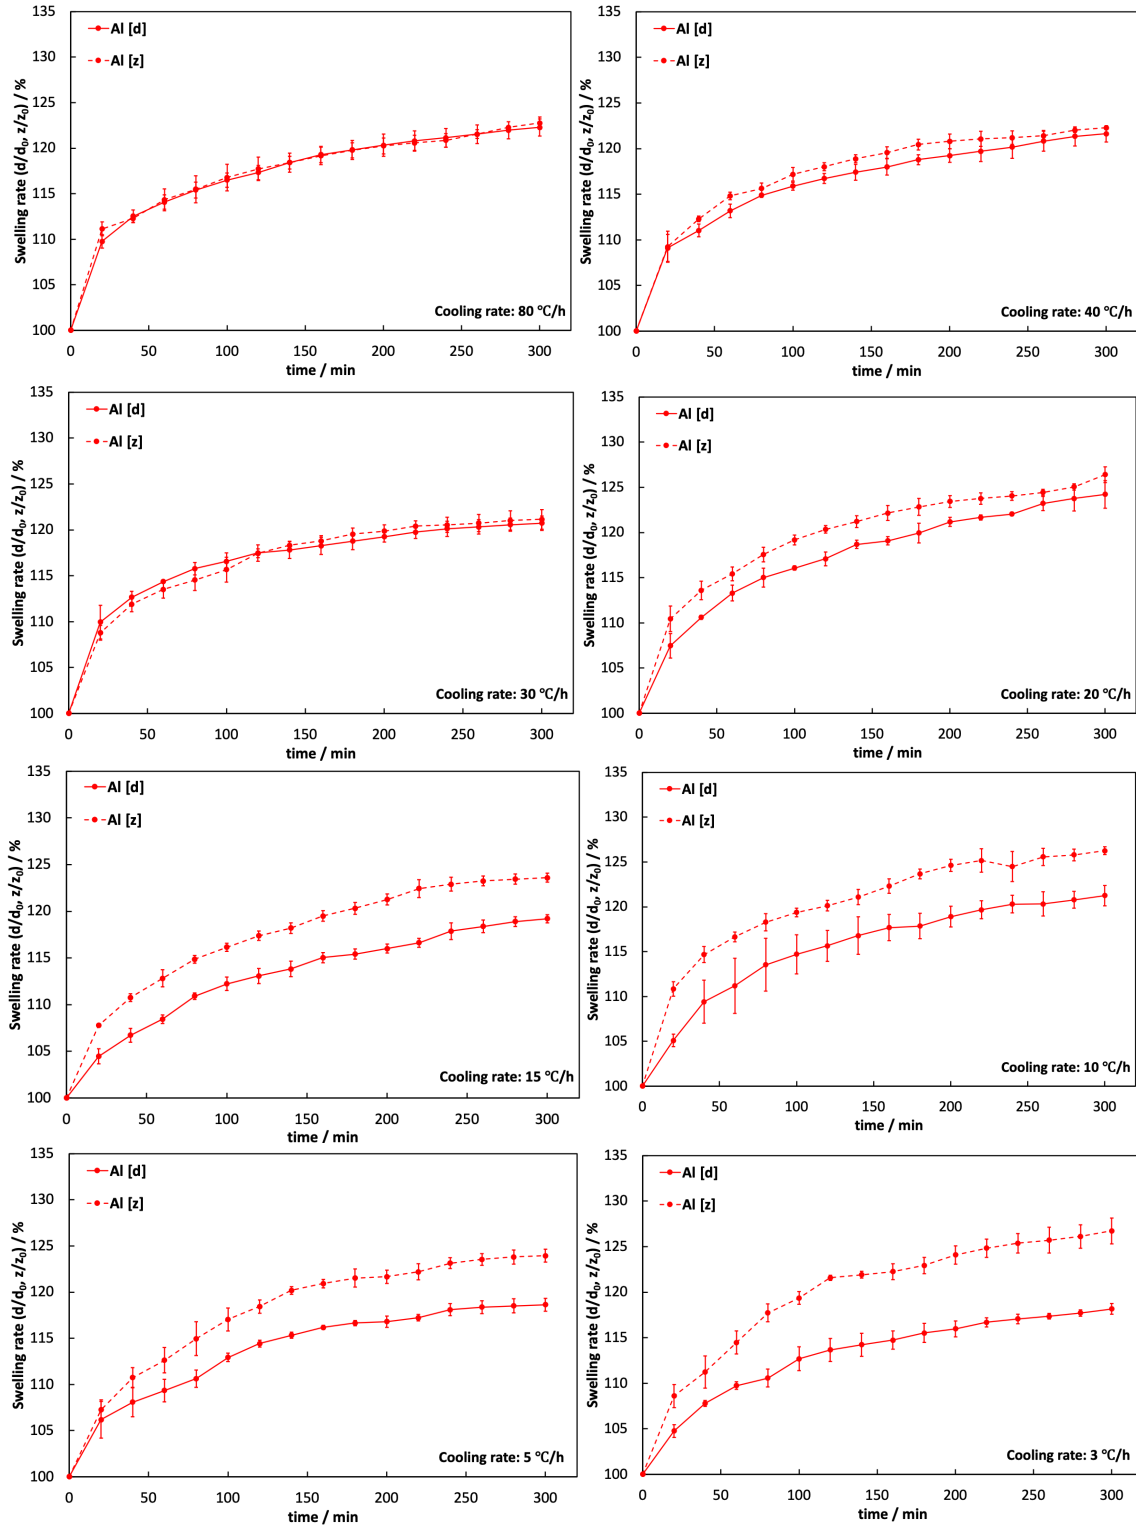

**Figure S3.** Swelling rates of the hydrogels prepared at eight different cooling rates. Swelling tests were performed using the prepared hydrogels with a thickness of 5 mm. The black, blue, green, and red lines show the swelling behavior of the gelatin hydrogels prepared in the glass, PP, PVC, and Al systems, respectively.
